# Supplementary material
Source: Springer Nature journal article supplement (https://www.springermedizin.de/resource/supplementary/12950_2012_293_MOESM7_ESM.pdf/9557504)

**A**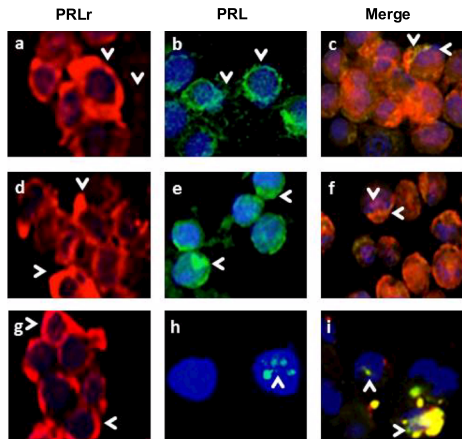**B**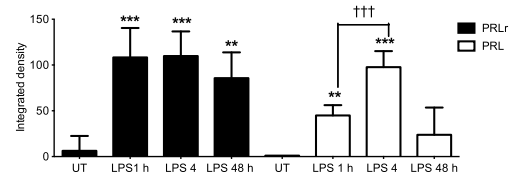**C** PRLr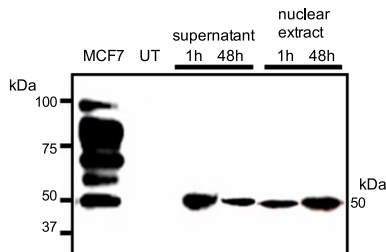**D** PRL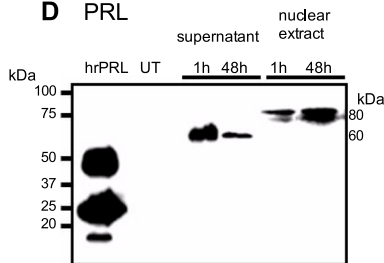

Supplement: MOESM7 [file 9557504]
